# Supplementary material for: Four novel Zn(II)/Cd(II) metal–organic frameworks constructed from 4′-(4-pyridyl)-4,2′:6′,4″-terpyridine: hydrothermal synthesis, crystal structures, and luminescent properties
Source: Royal Society of Chemistry journal article supplement (doi:10.1039/b912415b), 2009-09-22

***Supporting Information for:***

**Four novel Zn(II)/Cd(II) metal-organic frameworks constructed from 4'-(4-pyridyl)-4,2':6',4''-terpyridine: hydrothermal synthesis, crystal structures, and luminescent properties**

**Bao-Cheng Wang, Qing-Ran Wu, Huai-Ming Hu\*, Xiao-Li Chen, Zhen-Hua Yang, Yi-Qing Shangguan, Meng-Lin Yang, and Gang-Lin Xue**

Key Laboratory of Synthetic and Natural Functional Molecule Chemistry of Ministry of Education, College of Chemistry and Materials Science, Northwest University, Xi'an 710069, China

Corresponding Author: Huai-Ming Hu.

Tel/Fax: 0086-29-88303331.

Email address: [Chemhu1@nwu.edu.cn](mailto:Chemhu1@nwu.edu.cn)

**Table S1.** Selected bond distances /Å and bond angles /° for **1- 4<sup>a</sup>**

| <b>Compound 1</b>   |            |                     |             |
|---------------------|------------|---------------------|-------------|
| Zn(1)-N(1)          | 2.056(3)   | Zn(1)-N(3)#1        | 2.060(3)    |
| Zn(1)-Cl(1)         | 2.2373(12) | Zn(1)-Cl(2)         | 2.2088 (12) |
| N(1)-C(1)           | 1.336(4)   | N(1)-C(5)           | 1.340(4)    |
| N(2)-C(6)           | 1.352(4)   | N(2)-C(10)          | 1.357(4)    |
| N(3)-C(15)          | 1.332(5)   | N(3)-C(11)          | 1.335(4)    |
| N(3)-Zn(1)#2        | 2.060(3)   | N(4)-C(20)          | 1.314(5)    |
| N(4)-C(16)          | 1.323(5)   |                     |             |
|                     |            |                     |             |
| N(1)-Zn(1)-N(3)#1   | 108.31(11) | N(1)-Zn(1)-Cl(2)    | 105.07(8)   |
| N(3)#1-Zn(1)-Cl(2)  | 109.67(9)  | N(1)-Zn(1)-Cl(1)    | 108.96(9)   |
| N(3)#1-Zn(1)-Cl(1)  | 102.96(9)  | Cl(2)-Zn(1)-Cl(1)   | 121.41(5)   |
| C(1)-N(1)-C(5)      | 116.4(3)   | C(1)-N(1)-Zn(1)     | 119.0(2)    |
| C(5)-N(1)-Zn(1)     | 124.3(2)   | C(6)-N(2)-C(10)     | 119.0(3)    |
| C(15)-N(3)-C(11)    | 116.9(3)   | C(15)-N(3)-Zn(1)#2  | 122.0(2)    |
| C(11)-N(3)-Zn(1)#2  | 120.9(3)   | C(20)-N(4)-C(16)    | 115.5(3)    |
| N(1)-C(1)-C(2)      | 123.1(3)   | N(1)-C(5)-C(4)      | 123.8(3)    |
| N(1)-C(1)-H(1)      | 118.4      | N(2)-C(6)-C(3)      | 117.7(3)    |
| N(2)-C(6)-C(7)      | 121.0(3)   | N(2)-C(10)-C(13)    | 117.4(3)    |
| N(2)-C(10)-C(9)     | 121.5(3)   | N(3)-C(15)-C(14)    | 123.4(3)    |
| N(3)-C(11)-C(12)    | 123.4(3)   | N(4)-C(20)-C(19)    | 125.2(4)    |
| N(4)-C(16)-C(17)    | 124.9(4)   |                     |             |
|                     |            |                     |             |
| <b>Compound 2</b>   |            |                     |             |
| Zn(1)-O(1)          | 2.083(2)   | Zn(1)-O(4)#1        | 2.088(2)    |
| Zn(1)-O(3)          | 2.093(2)   | Zn(1)-N(3)#2        | 2.142(3)    |
| Zn(1)-N(1)          | 2.162(3)   | Zn(1)-O(2)#3        | 2.164(2)    |
| N(1)-C(5)           | 1.326(4)   | N(1)-C(1)           | 1.337(4)    |
| N(2)-C(10)          | 1.340(4)   | N(2)-C(6)           | 1.340(4)    |
| N(3)-C(15)          | 1.330(4)   | N(3)-C(11)          | 1.332(4)    |
| N(3)-Zn(1)#4        | 2.141(3)   | N(4)-C(16)          | 1.322(6)    |
| N(4)-C(20)          | 1.337(6)   | O(1)-C(21)          | 1.256(4)    |
| O(2)-C(21)          | 1.238(4)   | O(2)-Zn(1)#3        | 2.164(2)    |
| O(3)-C(22)          | 1.247(3)   | O(4)-C(22)          | 1.250(3)    |
| O(4)-Zn(1)#1        | 2.088(2)   |                     |             |
|                     |            |                     |             |
| O(1)-Zn(1)-O(4)#1   | 173.44(8)  | O(1)-Zn(1)-O(3)     | 97.70(9)    |
| O(4)#1-Zn(1)-O(3)   | 80.27(8)   | O(1)-Zn(1)-N(3)#2   | 88.11(9)    |
| O(4)#1-Zn(1)-N(3)#2 | 98.29(10)  | O(3)-Zn(1)-N(3)#2   | 96.20(9)    |
| O(1)-Zn(1)-N(1)     | 96.55(10)  | O(4)#1-Zn(1)-N(1)   | 84.63(9)    |
| O(3)-Zn(1)-N(1)     | 163.40(9)  | N(3)#2-Zn(1)-N(1)   | 92.73(10)   |
| O(1)-Zn(1)-O(2)#3   | 78.57(8)   | O(4)#1-Zn(1)-O(2)#3 | 95.03(9)    |
| O(3)-Zn(1)-O(2)#3   | 85.90(9)   | N(3)#2-Zn(1)-O(2)#3 | 166.68(9)   |
| N(1)-Zn(1)-O(2)#3   | 88.61(10)  | C(5)-N(1)-C(1)      | 116.6(3)    |
| C(5)-N(1)-Zn(1)     | 122.8(2)   | C(1)-N(1)-Zn(1)     | 120.3(2)    |
| C(10)-N(2)-C(6)     | 118.5(3)   | C(15)-N(3)-C(11)    | 115.9(3)    |
| C(15)-N(3)-Zn(1)#4  | 125.2(2)   | C(11)-N(3)-Zn(1)#4  | 118.0(2)    |
| C(16)-N(4)-C(20)    | 115.3(4)   | C(21)-O(1)-Zn(1)    | 114.7(2)    |

|                    |            |                    |            |
|--------------------|------------|--------------------|------------|
| C(21)-O(2)-Zn(1)#3 | 112.22(19) | C(22)-O(3)-Zn(1)   | 112.43(18) |
| C(22)-O(4)-Zn(1)#1 | 112.65(18) | N(1)-C(1)-C(2)     | 123.7(3)   |
| N(1)-C(5)-C(4)     | 123.2(3)   | N(2)-C(6)-C(7)     | 122.2(3)   |
| N(2)-C(6)-C(3)     | 114.5(3)   | N(2)-C(10)-C(9)    | 122.4(3)   |
| N(2)-C(10)-C(13)   | 113.8(3)   | N(3)-C(11)-C(12)   | 123.7(3)   |
| N(3)-C(15)-C(14)   | 124.2(3)   | N(4)-C(16)-C(17)   | 125.0(4)   |
| N(4)-C(20)-C(19)   | 124.1(4)   | O(2)-C(21)-O(1)    | 125.5(3)   |
| O(2)-C(21)-C(21)#3 | 117.7(3)   | O(1)-C(21)-C(21)#3 | 116.8(3)   |
| O(3)-C(22)-O(4)    | 125.7(3)   | O(3)-C(22)-C(22)#1 | 117.3(3)   |
| O(4)-C(22)-C(22)#1 | 117.0(3)   |                    |            |

**Compound 3**

|              |           |              |           |
|--------------|-----------|--------------|-----------|
| Cd(1)-N(1)   | 2.318(5)  | Cd(1)-O(1)#1 | 2.323(4)  |
| Cd(1)-N(3)#2 | 2.360(5)  | Cd(1)-O(5)#3 | 2.384(5)  |
| Cd(1)-O(1)   | 2.418(5)  | Cd(1)-O(3)   | 2.446(5)  |
| Cd(1)-O(4)#3 | 2.515(6)  | N(1)-C(5)    | 1.317(8)  |
| N(1)-C(1)    | 1.341(8)  | N(2)-C(6)    | 1.348(8)  |
| N(2)-C(10)   | 1.366(8)  | N(3)-C(15)   | 1.320(8)  |
| N(3)-C(11)   | 1.323(8)  | N(3)-Cd(1)#4 | 2.360(5)  |
| N(4)-C(16)   | 1.328(10) | N(4)-C(20)   | 1.333(10) |
| O(1)-C(21)   | 1.259(8)  | O(1)-Cd(1)#1 | 2.323(4)  |
| O(2)-C(21)   | 1.234(8)  | O(3)-C(22)   | 1.422(8)  |
| O(4)-C(24)   | 1.237(9)  | O(4)-Cd(1)#5 | 2.515(6)  |
| O(5)-C(24)   | 1.227(9)  | O(5)-Cd(1)#5 | 2.384(5)  |

|                     |            |                     |            |
|---------------------|------------|---------------------|------------|
| N(1)-Cd(1)-O(1)#1   | 90.02(17)  | N(1)-Cd(1)-N(3)#2   | 177.58(19) |
| O(1)#1-Cd(1)-N(3)#2 | 89.28(17)  | N(1)-Cd(1)-O(5)#3   | 89.3(2)    |
| O(1)#1-Cd(1)-O(5)#3 | 102.99(19) | N(3)#2-Cd(1)-O(5)#3 | 93.1(2)    |
| N(1)-Cd(1)-O(1)     | 90.55(17)  | O(1)#1-Cd(1)-O(1)   | 71.65(16)  |
| N(3)#2-Cd(1)-O(1)   | 87.03(17)  | O(5)#3-Cd(1)-O(1)   | 174.64(17) |
| N(1)-Cd(1)-O(3)     | 89.16(18)  | O(1)#1-Cd(1)-O(3)   | 135.94(17) |
| N(3)#2-Cd(1)-O(3)   | 89.72(18)  | O(5)#3-Cd(1)-O(3)   | 121.05(19) |
| O(1)-Cd(1)-O(3)     | 64.31(16)  | N(1)-Cd(1)-O(4)#3   | 98.45(19)  |
| O(1)#1-Cd(1)-O(4)#3 | 153.11(17) | N(3)#2-Cd(1)-O(4)#3 | 83.18(19)  |
| O(5)#3-Cd(1)-O(4)#3 | 52.02(18)  | O(1)-Cd(1)-O(4)#3   | 133.25(16) |
| O(3)-Cd(1)-O(4)#3   | 70.03(17)  | C(5)-N(1)-C(1)      | 116.5(6)   |
| C(5)-N(1)-Cd(1)     | 120.2(4)   | C(1)-N(1)-Cd(1)     | 123.1(4)   |
| C(6)-N(2)-C(10)     | 119.1(5)   | C(15)-N(3)-C(11)    | 115.8(6)   |
| C(15)-N(3)-Cd(1)#4  | 121.7(4)   | C(11)-N(3)-Cd(1)#4  | 122.3(5)   |
| C(16)-N(4)-C(20)    | 116.0(7)   | C(21)-O(1)-Cd(1)#1  | 125.5(5)   |
| C(21)-O(1)-Cd(1)    | 125.5(4)   | Cd(1)#1-O(1)-Cd(1)  | 108.35(17) |
| C(22)-O(3)-Cd(1)    | 122.5(4)   | C(24)-O(4)-Cd(1)#5  | 89.7(5)    |
| C(24)-O(5)-Cd(1)#5  | 96.3(5)    | N(1)-C(1)-C(2)      | 123.2(6)   |
| N(1)-C(5)-C(4)      | 123.9(6)   | N(2)-C(6)-C(7)      | 121.1(6)   |
| N(2)-C(6)-C(3)      | 117.4(5)   | N(2)-C(10)-C(9)     | 120.9(5)   |
| N(2)-C(10)-C(13)    | 117.0(5)   | N(3)-C(11)-C(12)    | 123.7(7)   |
| N(3)-C(15)-C(14)    | 125.0(6)   | N(4)-C(16)-C(17)    | 124.1(8)   |
| N(4)-C(20)-C(19)    | 123.8(8)   | O(2)-C(21)-C(22)    | 117.7(6)   |
| O(1)-C(21)-C(22)    | 116.7(6)   | O(3)-C(22)-C(23)    | 112.8(6)   |

|                  |          |                  |          |
|------------------|----------|------------------|----------|
| O(3)-C(22)-C(21) | 109.8(5) | O(4)-C(24)-C(23) | 117.9(7) |
| O(5)-C(24)-C(23) | 120.4(7) | O(5)-C(24)-O(4)  | 121.7(8) |

**Compound 4**

|                     |            |                     |            |
|---------------------|------------|---------------------|------------|
| Zn(1)-O(7)          | 1.919(4)   | Zn(1)-O(2)          | 1.993(4)   |
| Zn(1)-O(6)#1        | 1.997(5)   | Zn(1)-N(1)          | 2.035(4)   |
| Zn(1)-O(1)          | 2.447(4)   | Zn(2)-O(7)          | 1.911(4)   |
| Zn(2)-O(5)#1        | 1.980(5)   | Zn(2)-O(3)#2        | 2.051(5)   |
| Zn(2)-N(3)#3        | 2.075(5)   | Zn(2)-O(4)#2        | 2.431(6)   |
| N(1)-C(14)          | 1.355(7)   | N(1)-C(10)          | 1.338(7)   |
| N(2)-C(15)          | 1.369(9)   | N(2)-C(19)          | 1.315(9)   |
| N(3)-C(20)          | 1.314(8)   | N(3)-C(24)          | 1.308(8)   |
| N(4)-C(27)          | 1.37(3)    | N(3)-Zn(2)#4        | 2.075(5)   |
| N(4')-C(27')        | 1.30(4)    | N(4)-C(28)          | 1.40(3)    |
| O(1)-C(1)           | 1.243(7)   | O(2)-C(1)           | 1.264(7)   |
| O(3)-C(2)           | 1.236(8)   | O(3)-Zn(2)#5        | 2.051(5)   |
| O(4)-C(2)           | 1.223(8)   | O(4)-Zn(2)#5        | 2.431(5)   |
| O(5)-C(3)           | 1.275(7)   | O(5)-Zn(2)#6        | 1.980(5)   |
| O(6)-C(3)           | 1.222(7)   | O(6)-Zn(1)#6        | 1.997(5)   |
| C(2)-Zn(2)#5        | 2.538(7)   |                     |            |
| O(7)-Zn(1)-O(2)     | 114.09(19) | O(7)-Zn(1)-O(6)#1   | 103.51(18) |
| O(2)-Zn(1)-O(6)#1   | 94.42(18)  | O(7)-Zn(1)-N(1)     | 104.42(18) |
| O(2)-Zn(1)-N(1)     | 132.60(19) | O(6)#1-Zn(1)-N(1)   | 102.63(19) |
| O(7)-Zn(1)-O(1)     | 92.84(17)  | O(2)-Zn(1)-O(1)     | 58.02(15)  |
| O(6)#1-Zn(1)-O(1)   | 152.12(16) | N(1)-Zn(1)-O(1)     | 94.78(16)  |
| O(7)-Zn(2)-O(5)#1   | 106.02(19) | O(7)-Zn(2)-O(3)#2   | 113.3(2)   |
| O(5)#1-Zn(2)-O(3)#2 | 104.2(2)   | O(7)-Zn(2)-N(3)#3   | 108.5(2)   |
| O(5)#1-Zn(2)-N(3)#3 | 97.1(2)    | O(3)#2-Zn(2)-N(3)#3 | 124.8(2)   |
| O(7)-Zn(2)-O(4)#2   | 95.49(18)  | O(5)#1-Zn(2)-O(4)#2 | 155.96(19) |
| O(3)#2-Zn(2)-O(4)#2 | 56.22(18)  | N(3)#3-Zn(2)-O(4)#2 | 85.91(18)  |
| O(7)-Zn(2)-C(2)#2   | 100.8(2)   | O(5)#1-Zn(2)-C(2)#2 | 133.0(2)   |
| O(3)#2-Zn(2)-C(2)#2 | 28.84(19)  | N(3)#3-Zn(2)-C(2)#2 | 110.2(2)   |
| O(4)#2-Zn(2)-C(2)#2 | 28.40(18)  | C(10)-N(1)-C(14)    | 117.8(5)   |
| C(10)-N(1)-Zn(1)    | 119.2(4)   | C(14)-N(1)-Zn(1)    | 122.2(4)   |
| C(19)-N(2)-C(15)    | 118.1(5)   | C(24)-N(3)-C(20)    | 117.8(5)   |
| C(24)-N(3)-Zn(2)#4  | 122.5(4)   | C(20)-N(3)-Zn(2)#4  | 119.1(5)   |
| C(27)-N(4)-C(28)    | 115(2)     |                     |            |
| C(1)-O(1)-Zn(1)     | 79.6(4)    | C(1)-O(2)-Zn(1)     | 99.8(3)    |
| C(2)-O(3)-Zn(2)#5   | 98.0(4)    | C(2)-O(4)-Zn(2)#5   | 80.6(4)    |
| C(3)-O(5)-Zn(2)#6   | 129.9(5)   | C(3)-O(6)-Zn(1)#6   | 134.5(4)   |
| Zn(2)-O(7)-Zn(1)    | 118.2(2)   | O(1)-C(1)-O(2)      | 121.7(5)   |
| O(1)-C(1)-C(4)      | 119.4(6)   | O(2)-C(1)-C(4)      | 118.9(5)   |
| O(4)-C(2)-O(3)      | 120.8(6)   | O(4)-C(2)-C(6)      | 119.6(7)   |
| O(3)-C(2)-C(6)      | 119.4(6)   | O(4)-C(2)-Zn(2)#5   | 71.0(4)    |
| O(3)-C(2)-Zn(2)#5   | 53.2(3)    | C(6)-C(2)-Zn(2)#5   | 155.6(5)   |
| O(6)-C(3)-O(5)      | 126.2(6)   | O(6)-C(3)-C(8)      | 117.7(5)   |
| O(5)-C(3)-C(8)      | 116.2(6)   | N(1)-C(10)-C(11)    | 123.4(6)   |
| N(1)-C(14)-C(13)    | 120.8(6)   | N(2)-C(15)-C(25)    | 119.1(6)   |

|                  |          |                     |          |
|------------------|----------|---------------------|----------|
| N(3)-C(20)-C(21) | 120.8(6) | N(3)-C(24)-C(23)    | 124.0(6) |
| N(4)-C(27)-C(26) | 128(2)   | N(4')-C(27')-C(26') | 124 (2)  |

<sup>a</sup>Symmetry code for **1**: #1 (-x+1/2, y+1/2, -z+1/2), #2 (-x+1/2, y-1/2, -z+1/2); for **2**: #1 (-x, -y, -z), #2 (-x+1/2, y-1/2, -z+1/2), #3 (-x, -y+1, -z), #4 (-x+1/2, y+1/2, -z+1/2); for **3**: #1 (-x+1/2, -y+5/2, -z+2), #2 (x+1/2, -y+5/2, z+1/2), #3 (-x+1/2, y+1/2, z+5/2), #4 (x-1/2, -y+5/2, -1/2), #5 (-x+1/2, y-1/2, -z+5/2); for **4**: #1 (x, -y+2, -1/2), #2 (x, y-1, z), #3 (x-1/2, -y+3/2, z-1/2), #4 (x+1/2, -y+3/2, z+1/2), #5 (x, y+1, z), #6 (x, -y+2, z+1/2).

**Fig. S1** TGA curves of compounds **1-4** (a, b, c, d).

**(a)**

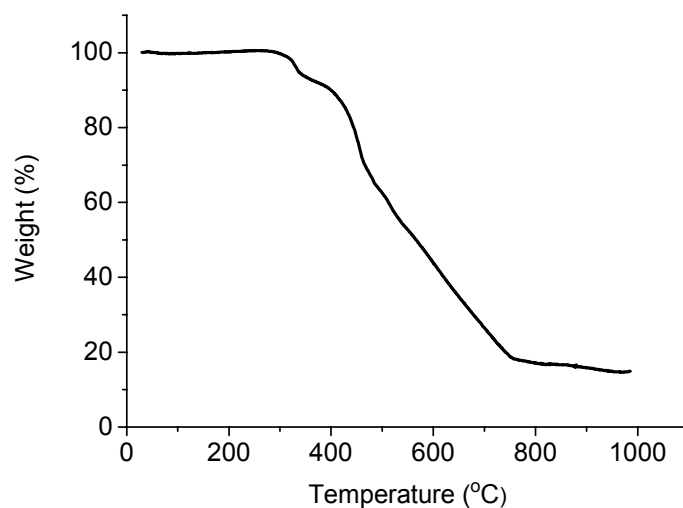

**(b)**

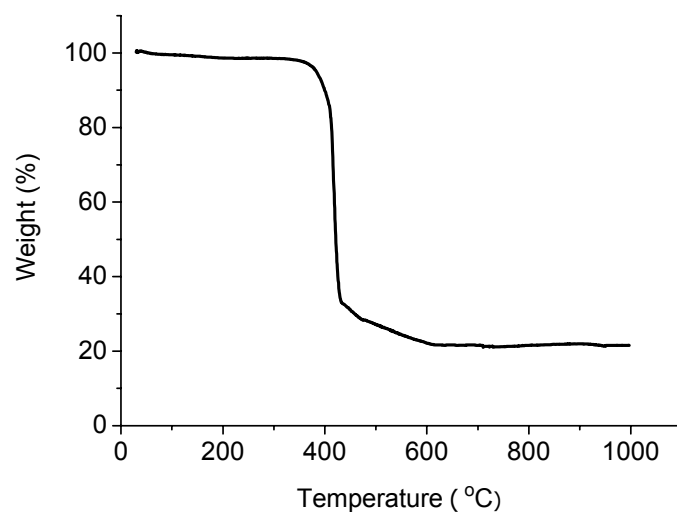

**(c)**

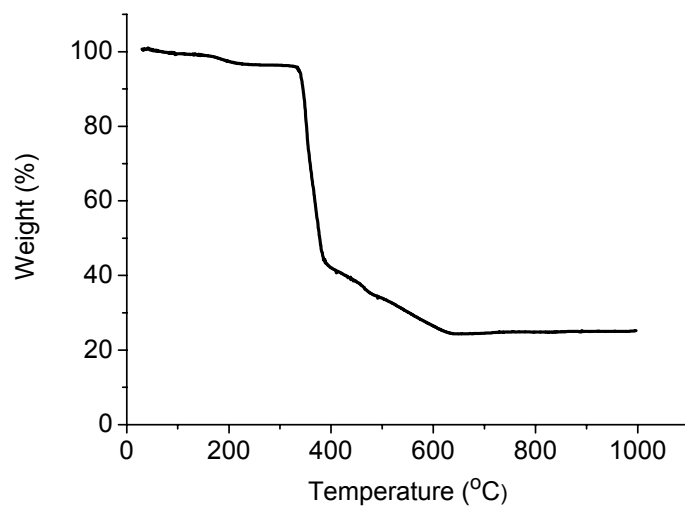

(d)

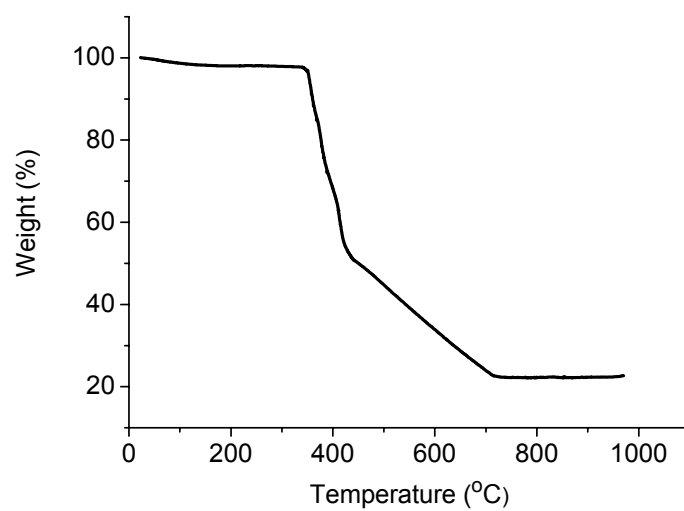

Supplement: b912415b.pdf [file b912415b.pdf]
